# Supplementary material for: A simple method for serving Web hypermaps with dynamic database drill-down
Source: Springer Nature journal article supplement (doi:10.1186/1476-072x-1-1), 2002-08-09
Supplement: Additional file 1 [file 1476-072x-1-1-s1.pdf]

## Example ASP page from HCM

The SQL query is highlighted in red in the code listing below. Note how *all* three DC *subject* fields in each resource record are searched for ICD-9-CM codes (E codes in this example):

```
((hcm.[dc:Subject:1]) Like 'E%')) OR ((hcm.[dc:Subject:2]) Like 'E%')) OR  
((hcm.[dc:Subject:3]) Like 'E%'))).
```

(N.B.: in ASP, the % sign is the equivalent of the \* wildcard used in standard SQL.)

### Code listing

```
<%@Language=VBScript%>  
<%Option Explicit%>  
<%Response.Buffer = True%>  
<!--#include virtual="adovbs.inc"-->  
<html>  
<TITLE>HealthCyberMap: E Codes</TITLE>  
  
<link rel="stylesheet" type="text/css" href="/style.css" /><BODY  
BGCOLOR="#FFFFFF">  
<script>  
function toggle(e) {  
    if (e.style.display == "none") {  
        e.style.display = "";  
    } else {  
        e.style.display = "none";  
    }  
}  
</script>  
<body>  
<a href="javascript:history.go(-1)">< Back</a>  
<hr color="#0071C0">  
<%  
Dim Page_Size  
Dim Current_Page  
Dim Page_Count  
Dim conn, RS, SQL  
  
Page_Size = 10 'this is where you set the # of records displayed per page  
  
If Request("Page") = "" Then  
    Current_Page = 1  
Else  
    Current_Page = CInt(Request("Page"))  
End If  
  
Set conn = Server.CreateObject("ADODB.Connection")  
Set RS=Server.CreateObject("ADODB.RecordSet")  
conn.Open "hcm", "", ""  
  
RS.CursorLocation = adUseClient  
RS.PageSize = Page_Size  
  
SQL = "SELECT hcm.[ID], hcm.[dc:Creator], hcm.[dc>Title],  
hcm.[dc:Subject:1], hcm.[dc:Subject:2], hcm.[dc:Subject:3],  
hcm.[dc>Description], hcm.[dc:Publisher], hcm.[dc>Date], hcm.[dc>Type],  
hcm.[dc:Identifier], hcm.[dc:Language], hcm.[dc:Coverage],  
hcm.[hcm:Location:city], hcm.[hcm:Location:country], hcm.[hcm:Quality],  
hcm.[hcm:Comment] FROM hcm WHERE ((hcm.[dc:Subject:1]) Like 'E%')) OR  
((hcm.[dc:Subject:2]) Like 'E%')) OR ((hcm.[dc:Subject:3]) Like 'E%'))"
```

```

RS.Open SQL, conn, adOpenStatic, adLockReadOnly, adCmdText
On Error Resume Next
Page_Count = RS.PageCount

If 1 > Current_Page Then Current_Page = 1
If Current_Page > Page_Count Then Current_Page = Page_Count

RS.AbsolutePage = Current_Page

Do While RS.AbsolutePage = Current_Page And Not RS.EOF
%>

<b>Author(s)/ Creator(s):</b> <%=RS("dc:Creator")%><BR>
<b>Resource Title:</b> <%=RS("dc>Title")%><BR>
<b>Type/ Category:</b> <%=RS("dc>Type")%><BR>
<b>Language:</b> <%=RS("dc:Language")%><BR>
<b><font color="red">URI:</font></b> <A HREF="<%=RS("dc:Identifier")%>"
Title="<%=RS("dc:Identifier")%>" Target="_blank">Launch in new
window</A><BR>
<div style="cursor: hand" onclick="toggle(document.all.a<%=RS("ID")%>);">
<FONT COLOR=#00008b><B>Show/ Hide Details</B></FONT></div>
<span style="display: None" id=a<%=RS("ID")%>>
<b>ICD-9-CM Subject Code 1:</b> <%=RS("dc:Subject:1")%><BR>
<b>ICD-9-CM Subject Code 2:</b> <%=RS("dc:Subject:2")%><BR>
<b>ICD-9-CM Subject Code 3:</b> <%=RS("dc:Subject:3")%><BR>
<b>ICD-9-CM Subject Description(s):</b> <%=RS("dc:Description")%><BR>
<b>Publisher(s):</b> <%=RS("dc:Publisher")%><BR>
<b>Author(s) and/or Publisher(s) City:</b> <%=RS("hcm:Location:city")%><BR>
<b>Author(s) and/or Publisher(s) Country:</b>
<%=RS("hcm:Location:country")%><BR>
<b>Coverage:</b> <%=RS("dc:Coverage")%><BR>
<b>Date of Last Update/ Review:</b> <%=RS("dc>Date")%><BR>
<b>Resource Quality Information:</b> <%=RS("hcm:Quality")%><BR>
<b>Comment(s):</b> <%=RS("hcm:Comment")%><BR>
</span>
<a
href="http://healthcybermap.semanticweb.org/icd.asp?SearchText=<%=RS("dc:Sub
ject:1")%>">Find all resources having the same primary subject as this
one</a><BR>

<hr color="#0071C0">

<%
RS.MoveNext
Loop

RS.Close
Set RS = Nothing
conn.Close
Set conn = Nothing

Response.Write "<td colspan=""4"" align=""center"">"
If Current_Page = 1 Then
Response.Write "<font color=""silver"" & size=""2"">" & "First </font><font
size=""2"">&nbsp;|</font> "
End If
If Current_Page >= 2 Then
Response.Write "<a href=""e-codes.asp?Page=1"
Response.Write """"><font size=""2""><< First</font></a><font size=""2"">
|</font> " & vbCrLf
End If
If Current_Page >= Page_Count Then
Response.Write "<font color=""silver"" Size=""2"">Next >></font><font
size=""2""> |&nbsp;</font>"
End If
If Current_Page < Page_Count Then
Response.Write "<a href=""e-codes.asp?Page="

```

```

Response.Write Current_Page + 1
Response.Write "<><font size=""2"">Next ></font></a>" & "&nbsp;<font
size=""2"">|</font>" & vbCrLf
End IF
If Current_Page <> 1 Then
Response.Write "<a href=""e-codes.asp?Page="
Response.Write Current_Page - 1
Response.Write "><font size=""2"">< Previous </font></a><font
size=""2"">&nbsp;</font> |</font> " & vbCrLf
Response.Write " " & vbCrLf
End If
If Current_Page = 1 Then
Response.Write "<font color=""silver"" & size=""2"">" & "< Previous
</font><font size="" "">|</font> "
End If
If Current_Page <> Page_Count Then
Response.Write "<a href=""e-codes.asp?Page="
Response.Write Page_Count
Response.Write "><font size=""2"">Last >></font></a>" & vbCrLf
End If
If Current_Page >= Page_Count Then
Response.Write "<font size=""2"" color=""silver"">Last</font>" & "</font>"
End If
%>
<br>
Page <%=Current_Page%> of <%=Page_Count%>
<br>
&copy; 2001, 2002 HealthCyberMap.org. All Rights Reserved.
</body>
</html>

```
